# Supplementary material for: MLN4924 Synergistically Enhances Cisplatin-induced Cytotoxicity via JNK and Bcl-xL Pathways in Human Urothelial Carcinoma
Source: PubMed Central journal article supplement (PMC4655337; doi:10.1038/srep16948), 2015-11-23
Supplement: srep16948-s1.pdf [file srep16948-s1.pdf]

## **Supplementary Information**

### **MLN4924 Synergistically Enhances Cisplatin-induced Cytotoxicity via JNK and Bcl-xL Pathways in Human Urothelial Carcinoma**

I-Lin Ho<sup>1\*</sup>, Kuan-Lin Kuo<sup>1,2\*</sup>, Shing-Hwa Liu<sup>2</sup>, Hong-Chiang Chang<sup>1</sup>, Ju-Ton Hsieh<sup>1</sup>,  
June-Tai Wu<sup>3</sup>, Chih-Kang Chiang<sup>2</sup>, Wei-Chou Lin<sup>4</sup>, Yu-Chieh Tsai<sup>5</sup>, Chien-Tso Chou<sup>1</sup>,  
Chen-Hsun Hsu<sup>1</sup>, Yeong-Shiau Pu<sup>1</sup>, Chung-Sheng Shi<sup>6‡</sup>, Kuo-How Huang<sup>1‡</sup>

**Supplementary Figure S1**

**Supplementary Figure S2**

**Supplementary Figure S3**

**Supplementary Figure S4**

**Supplementary Figure S5**

**Supplementary Figure S6**

**Supplementary Figure S7**

**Supplementary Figure S8**

**Supplementary Figure S9**

**Supplementary Figure S10**

**Supplementary Figure S11**

**Supplementary Figure S12**

**Figure S1**

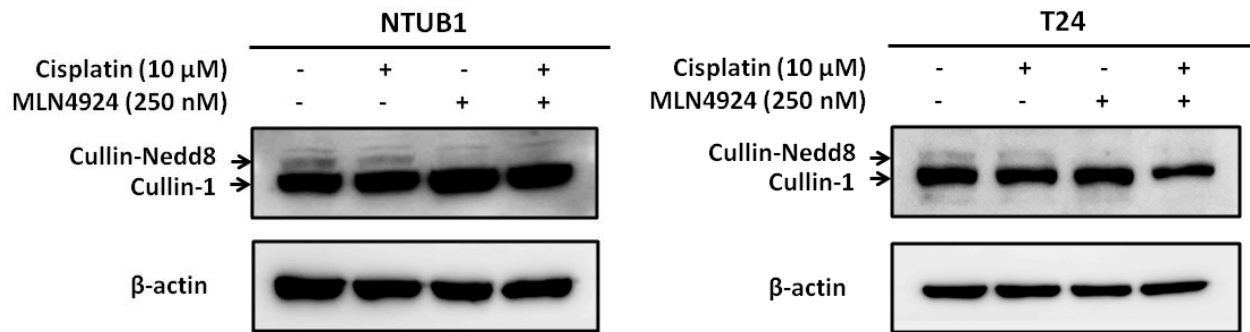

**Fig S1. MLN4924 induces de-neddylation in NTUB1 and T24 cells.** NTUB1 and T24 cells were treated with cisplatin and MLN4924 alone or in combination for 24 hours. Cell lysates were harvested and Cullin-1 was chosen as the target to demonstrate the neddylation inhibition activity of MLN4924 via western blotting. The results shown are representative of at least three independent experiments.

**Figure S2.**

**(A)**

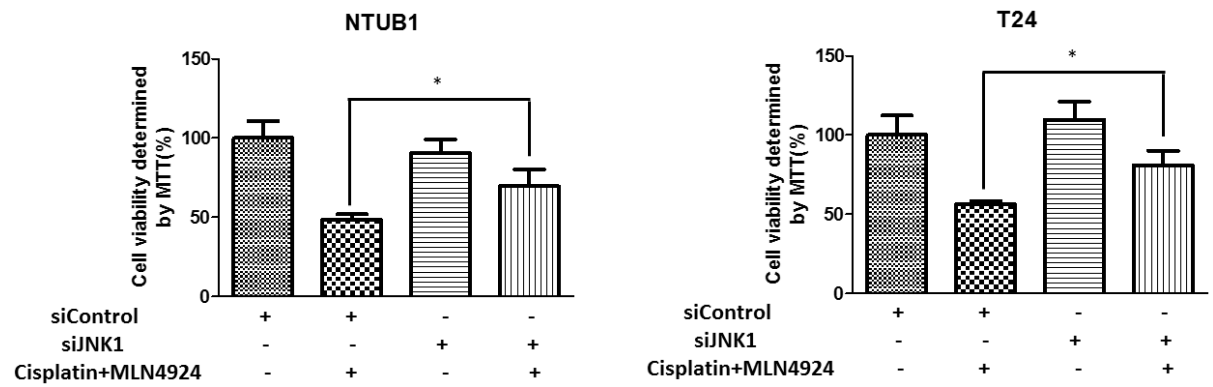

**(B)**

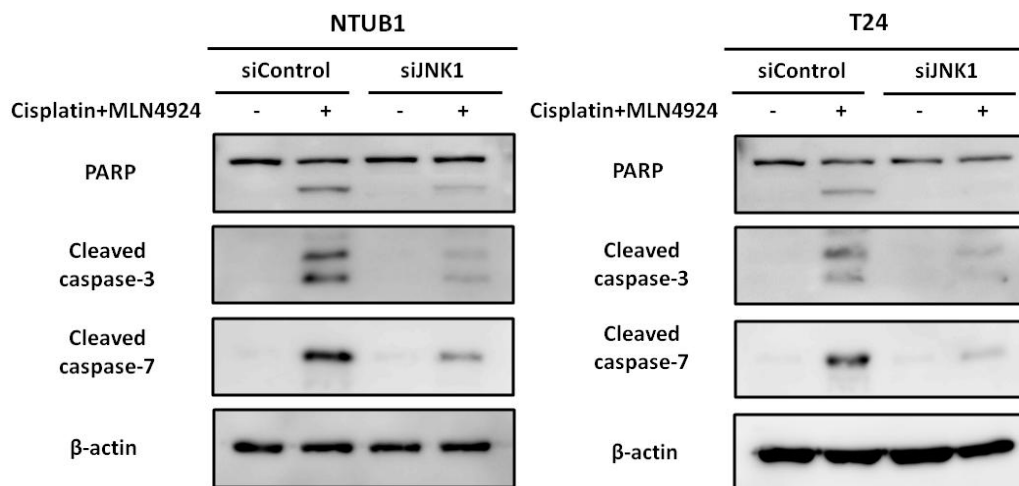

**(C)**

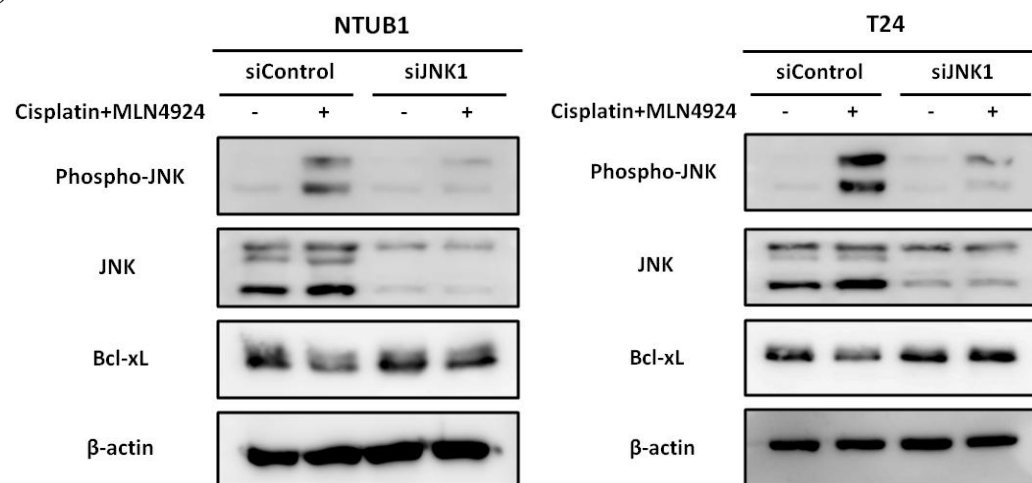

**Fig S2. JNK1 knockdown attenuates the apoptosis induced by the combination of cisplatin and MLN4924 and reverses the down-regulation of Bcl-xL.** NTUB1 and T24 cells were transfected with 25 nM siRNA mixed with DharmaFECT1 transfection reagent. After incubation for 48 hours, cells were treated with cisplatin (10  $\mu$ M) and MLN4924 (250 nM) for 24 hours. (A) Cell viability was determined by MTT assay. Quantitative analyses of cell viability are presented as the means  $\pm$  SD of three independent experiments. \* $p < 0.05$  represents a significant difference between the indicated groups. (B) and (C) Cell lysates were collected, and the activation of apoptosis (B) and JNK and Bcl-xL expression levels (C) were investigated using western blotting. The results shown are representative of at least three independent experiments.

**Fig S3.**

**(A)**

**NTUB1**

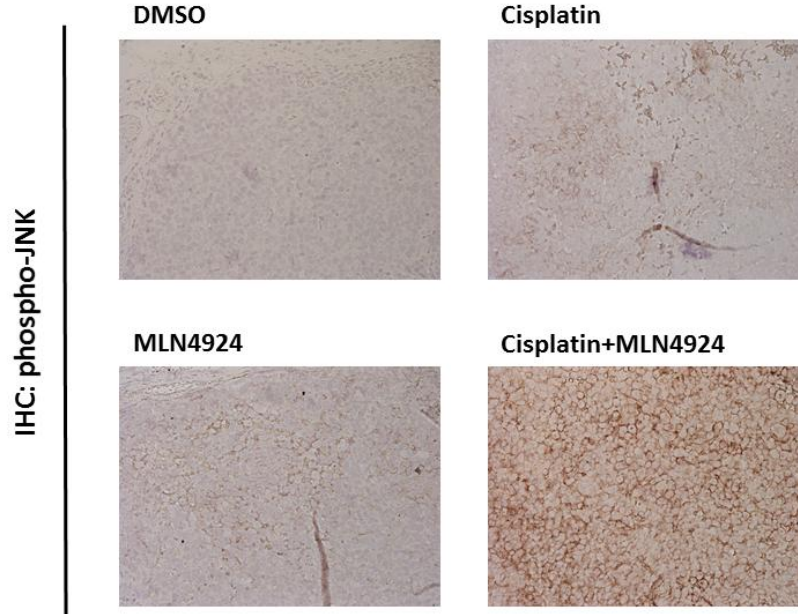

**(B)**

**T24**

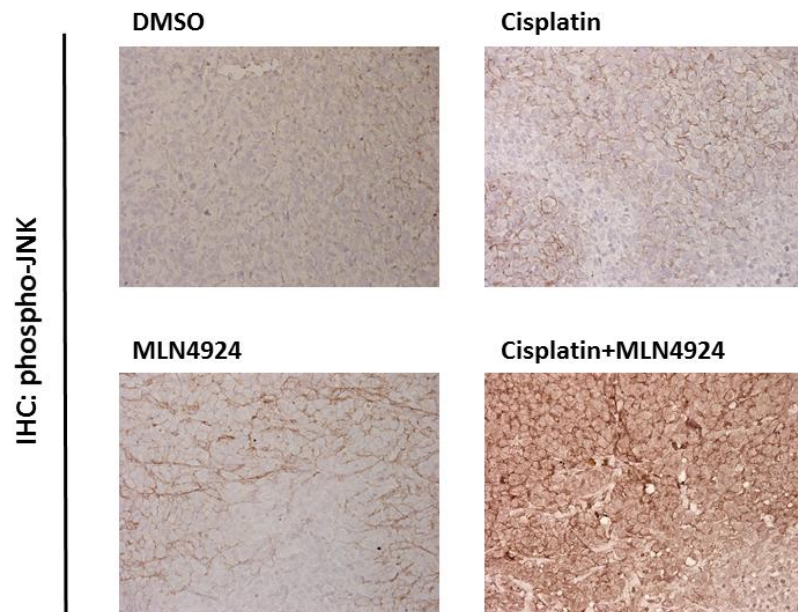

**Fig S3. The combination of cisplatin and MLN4924 treatment induces higher JNK activation in NTUB1 and T24 xenograft tumor tissues.**

(A) and (B) Paraffin-embedded tissue sections were deparaffinized in xylene and rehydrated through descending grades of ethanol. After heat-induced antigen retrieval, the endogenous peroxidase activity was quenched by treating the tissues with 3% H<sub>2</sub>O<sub>2</sub> for 10 minutes and rinsed in PBS for 5 minutes. The nonspecific binding was blocked with PBS containing 10% FBS and 3% BSA and incubated at room temperature for 90 minutes. After washing with PBS, slides were incubated with 1:50 dilution of anti-phospho-stress activated protein kinase (SAPK)/JNK (Thr183/Tyr185) primary antibodies (Cell Signaling Technology) at 4 °C overnight. Next day, slides were washed twice with PBS and incubated at RT with secondary antibodies (Dako REAL™ EnVision™ Detection System) for 30 minutes. After washing with PBS, the sections were incubated with 3',3'-diaminobenzidine (DAB) (Dako REAL™ EnVision™ Detection System) for 10 minutes. The tissue sections were then briefly rinsed in PBS, counterstained with hematoxylin (Sigma-Aldrich, St. Louis, MO, USA) and then mounted for microscope visualization (200X).

**Figure S4.**

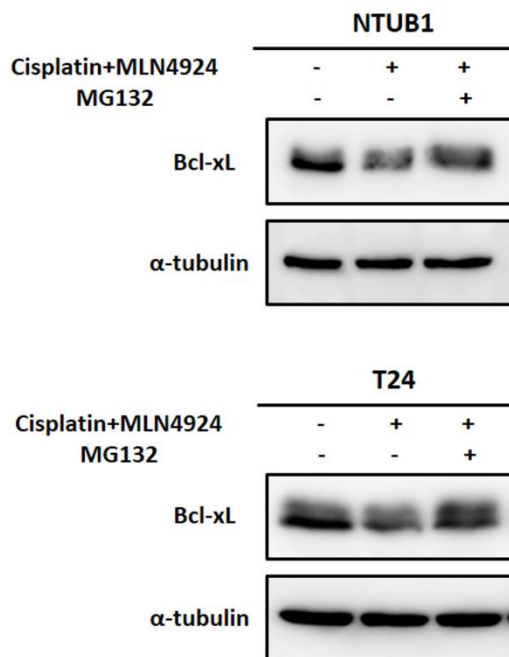

**Fig S4. The expression level of Bcl-xL is restored in the presence of MG132 when NTUB1 and T24 cells are treated with cisplatin and MLN4924 combination.**

NTUB1 and T24 cells were treated with the combination of cisplatin (10  $\mu$ M) and MLN4924 (250 nM) with or without the presence of MG132 (10  $\mu$ M), a proteasome inhibitor for 16 hours. Cell lysates were harvested and the expression level of Bcl-xL was assessed via western blotting. The results shown are representative of at least three independent experiments.

**Figure S5.**

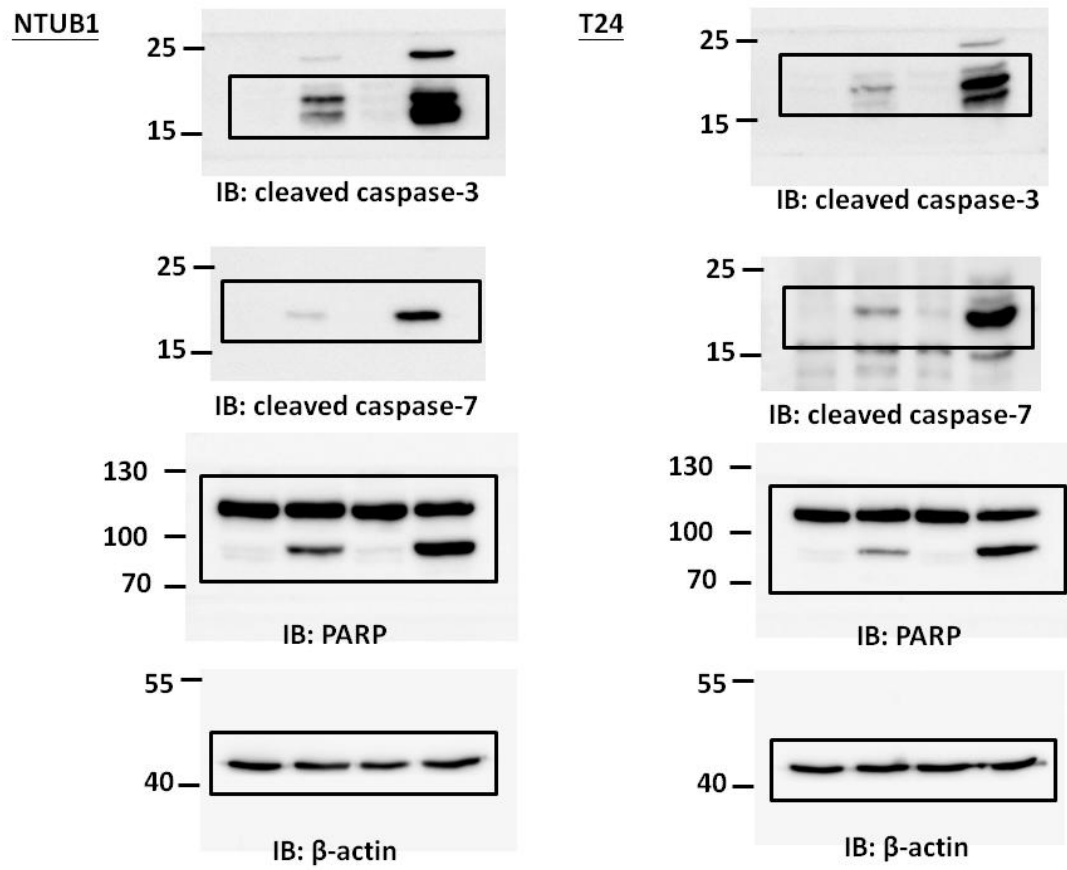

**Figure S5. Full-length gels and blots for main figures corresponded to Fig. 2A.** Molecular weight is shown at the left panel (kDa).



**Figure S6.**

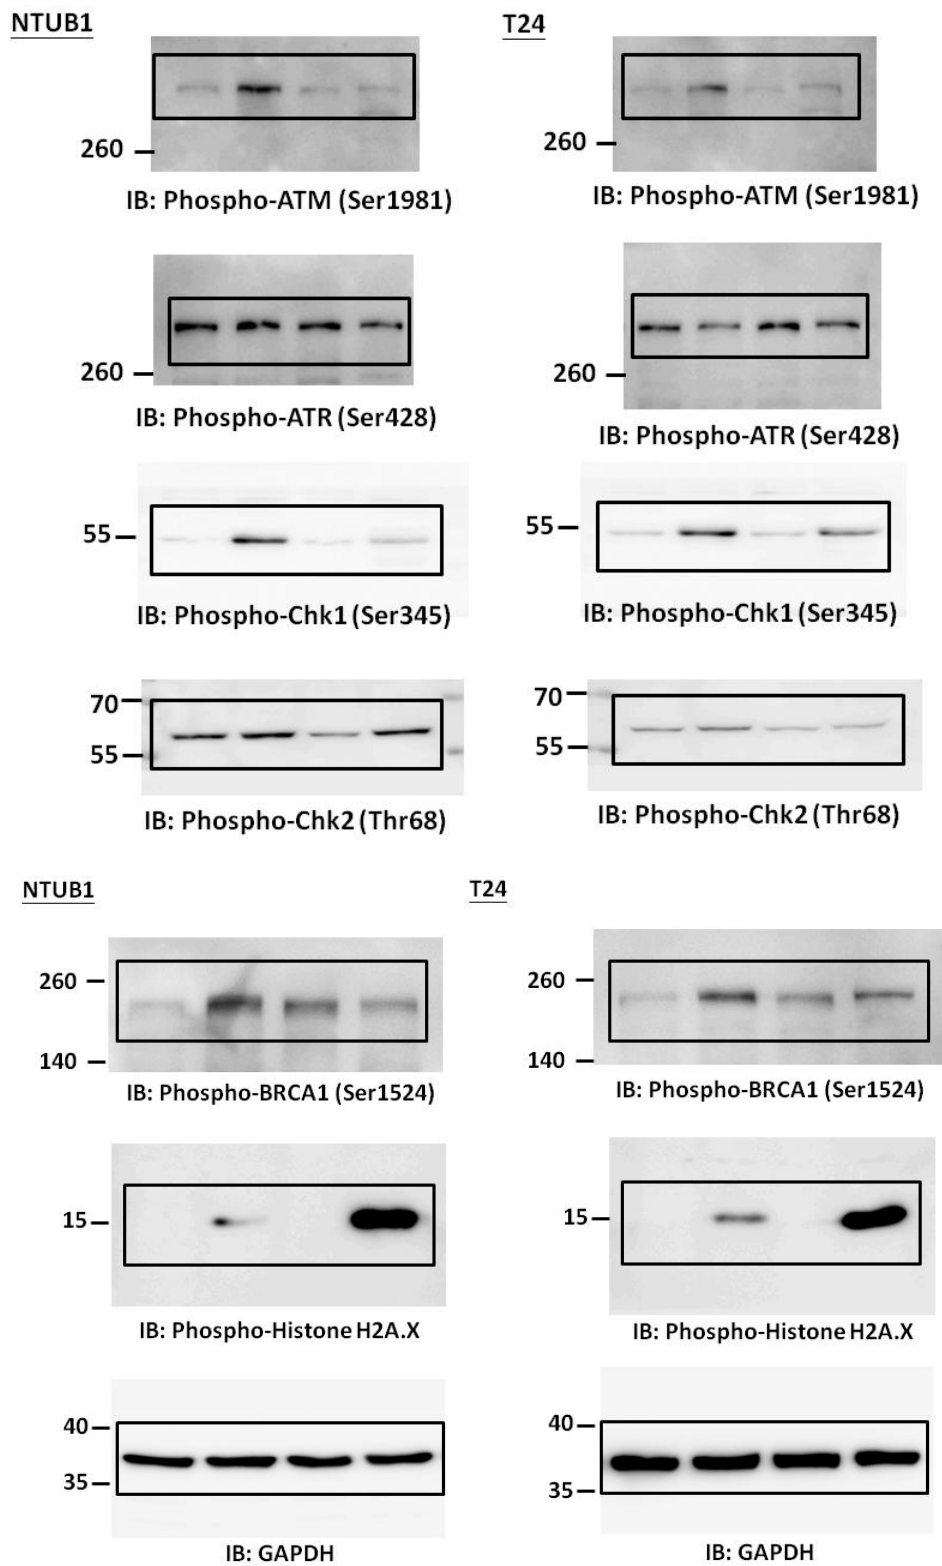

**Figure S6. Full-length gels and blots for main figures corresponded to Fig. 2B. Molecular weight is shown at the left panel (kDa).**

**Figure S7.**

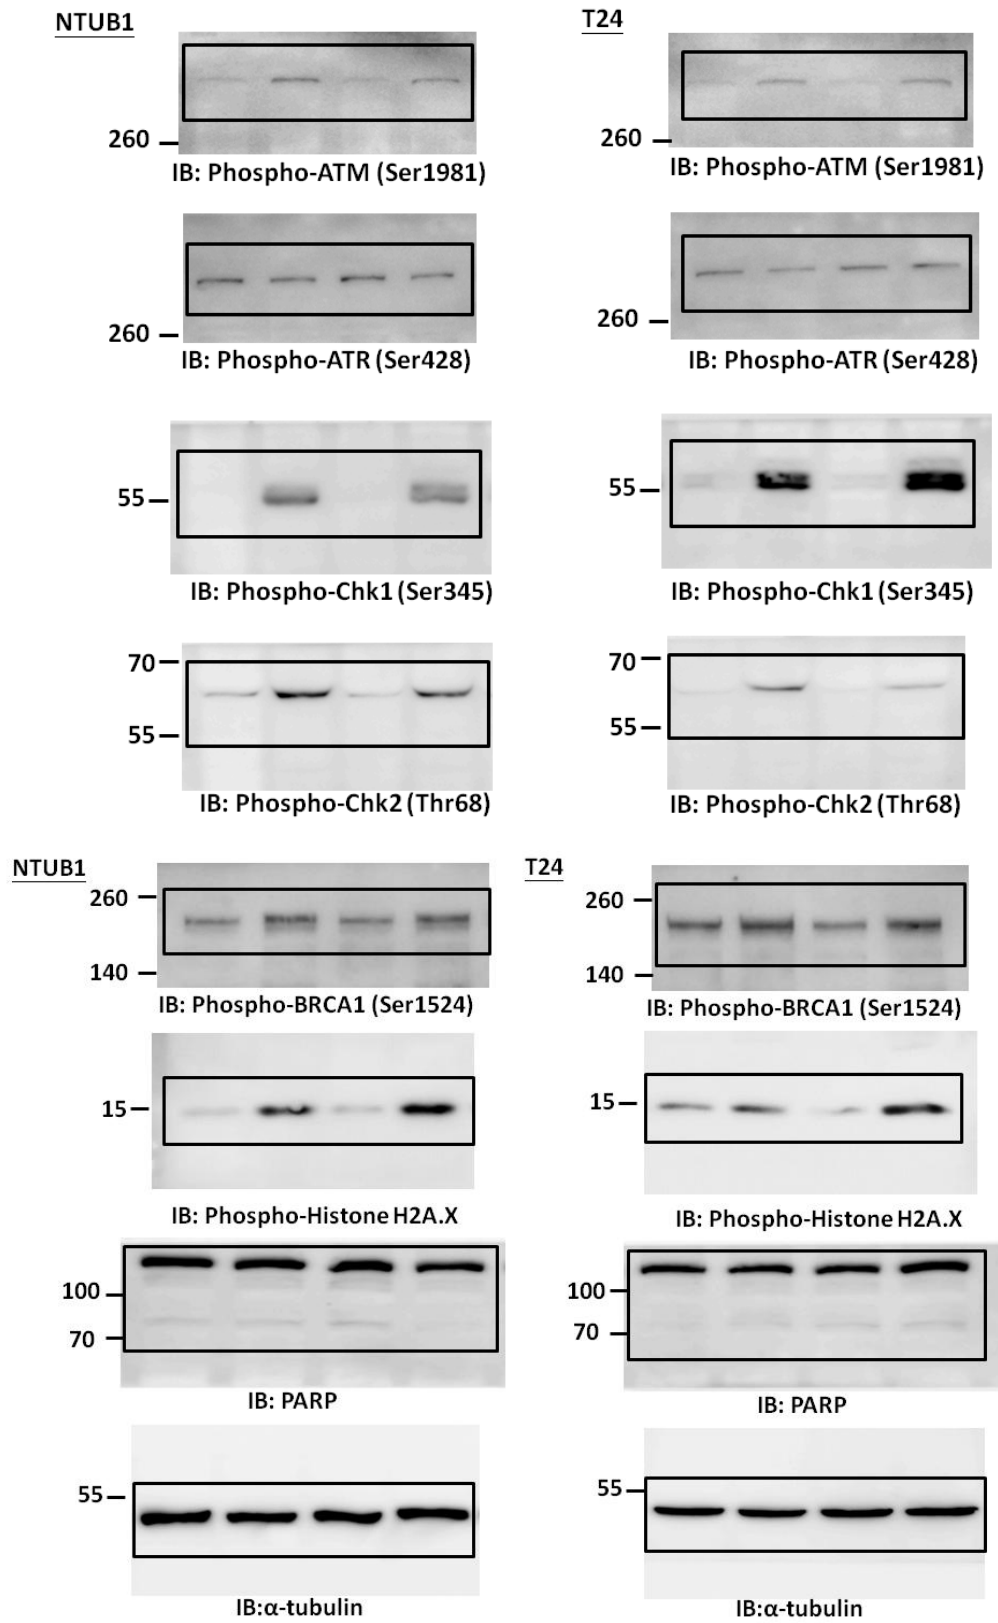

**Figure S7. Full-length gels and blots for main figures corresponded to Fig. 2C. Molecular weight is shown at the left panel (kDa).**

**Figure S8.**

**A**

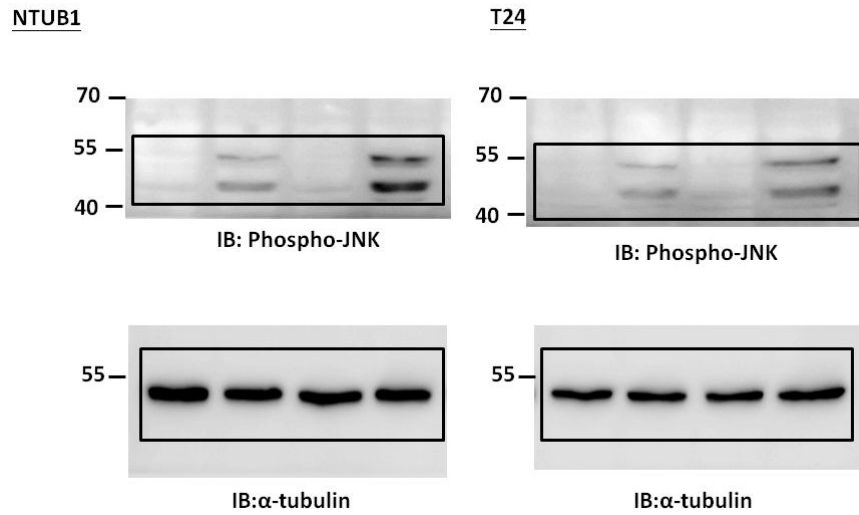

**B**

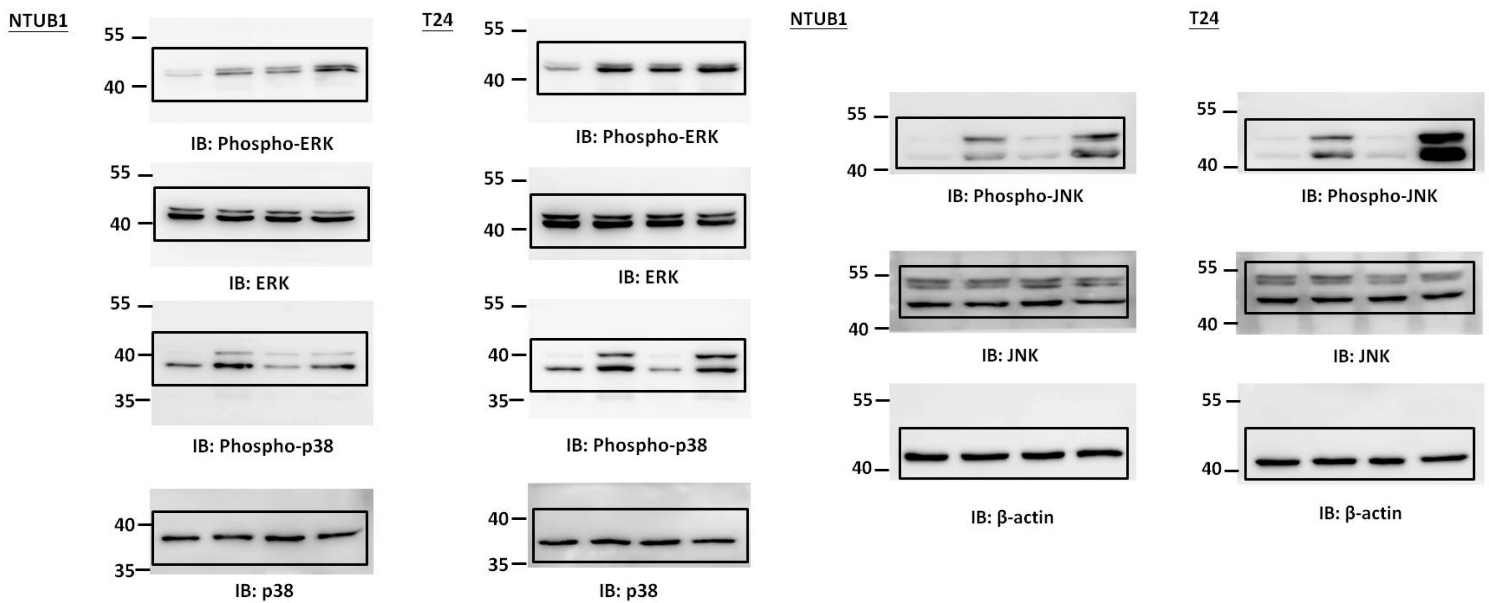

**Figure S8. Full-length gels and blots for main figures corresponded to Fig. 3A and 3B. Molecular weight is shown at the left panel (kDa).**

**Figure S9.**

NTUB1

T24

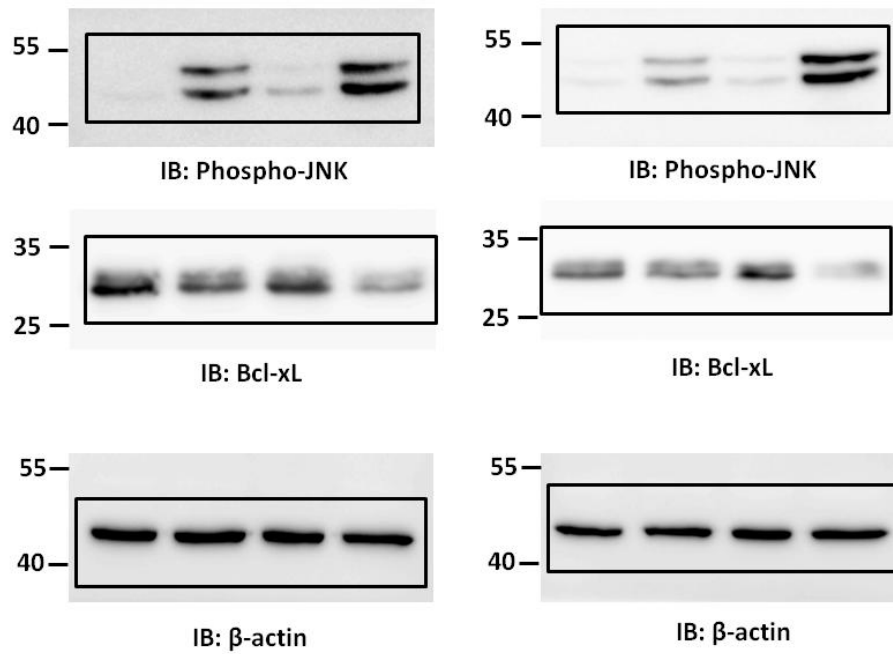

**Figure S9. Full-length gels and blots for main figures corresponded to Fig. 3C.** Molecular weight is shown at the left panel (kDa).

**Figure S10.**

**B**

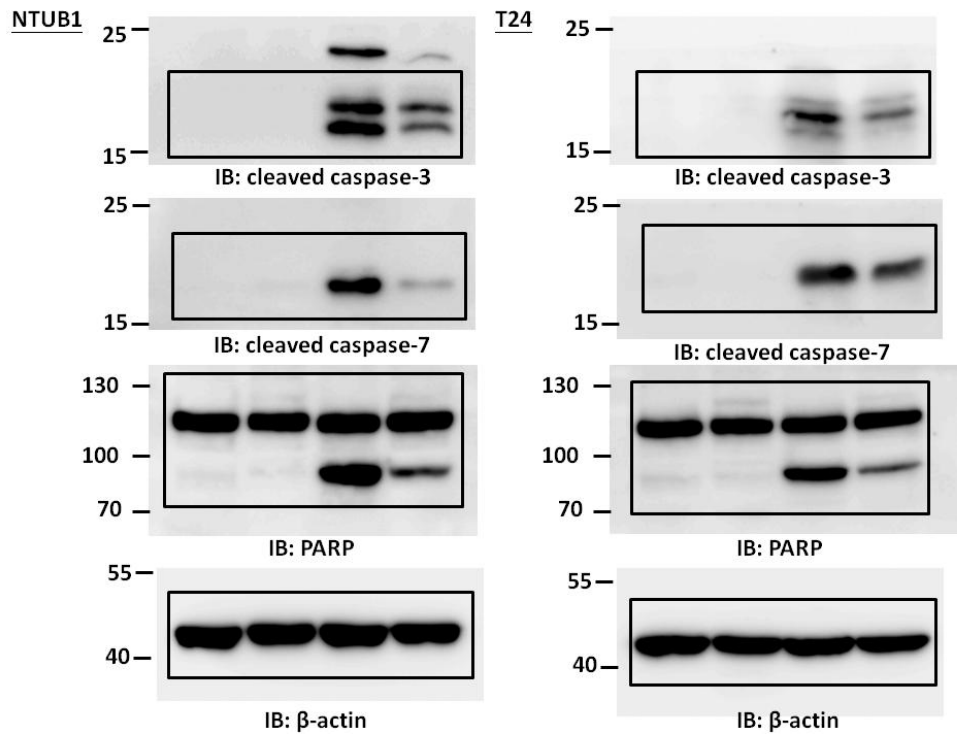

**C**

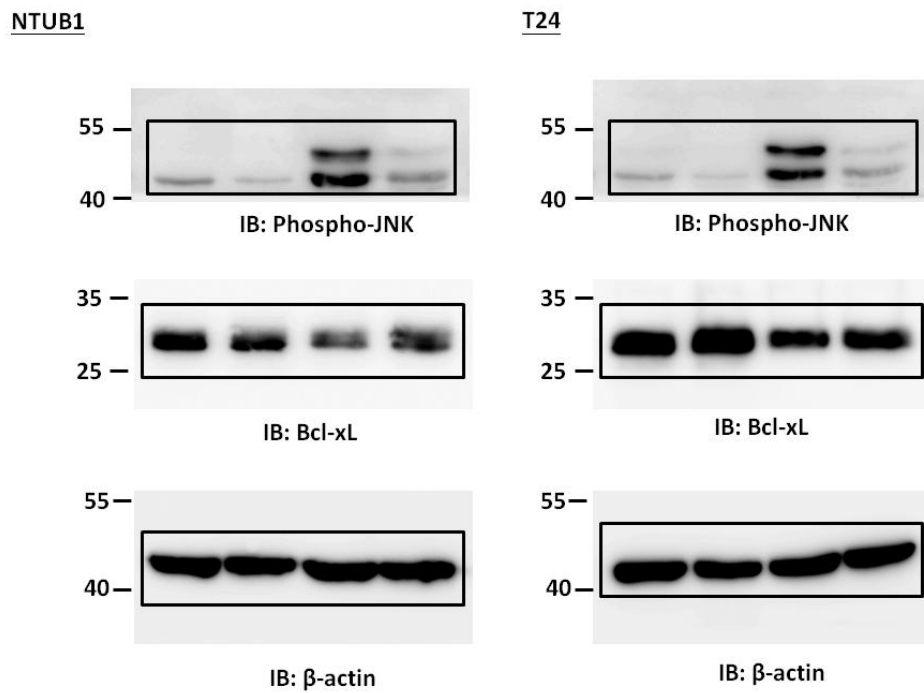

**Figure S10. Full-length gels and blots for main figures corresponded to Fig. 4B and 4C. Molecular weight is shown at the left panel (kDa).**

**Figure S11.**

NTUB1

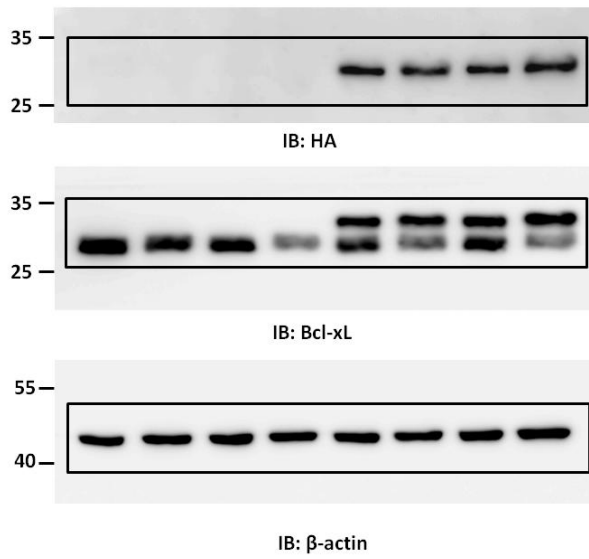

NTUB1

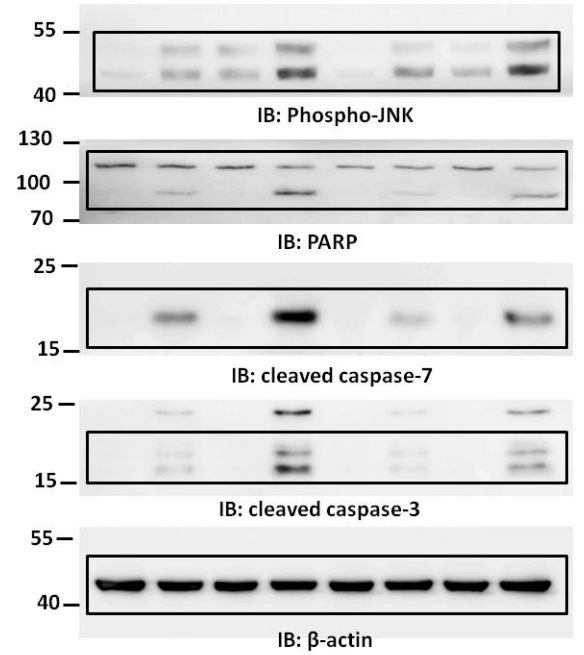

T24

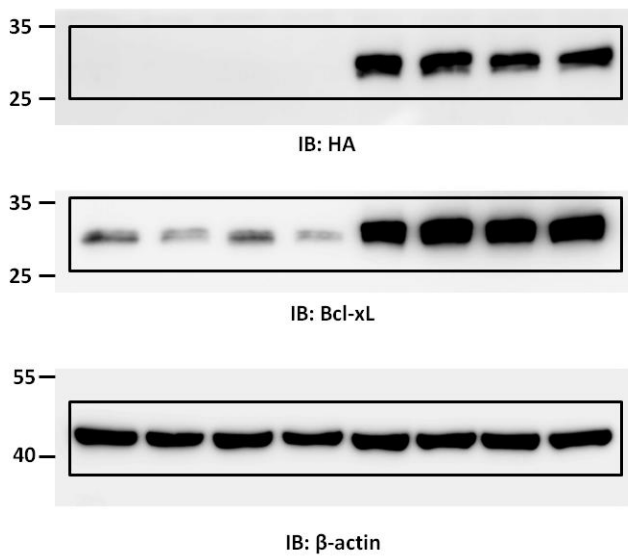

T24

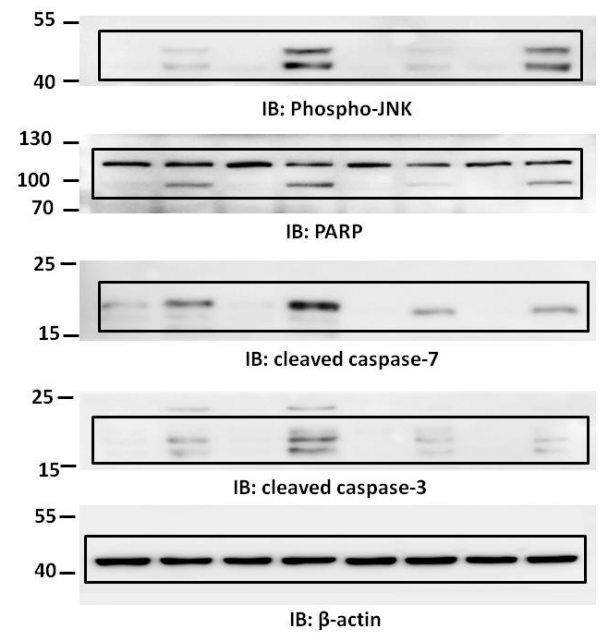

**Figure S11. Full-length gels and blots for main figures corresponded to Fig. 5B.**  
Molecular weight is shown at the left panel (kDa).

**Figure S12.**

**A**

NTUB1

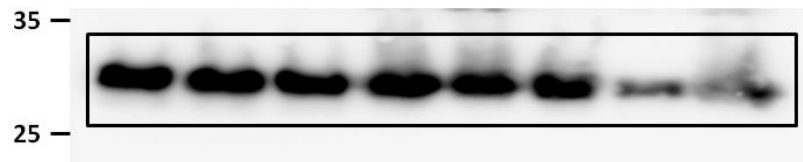

IB: Bcl-xL

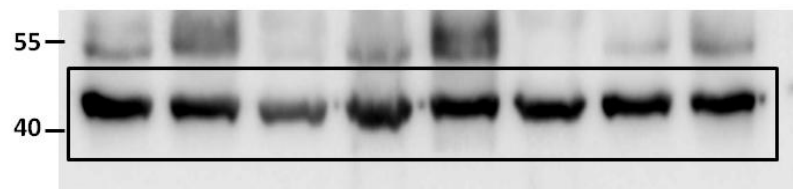

IB:  $\beta$ -actin

**B**

T24

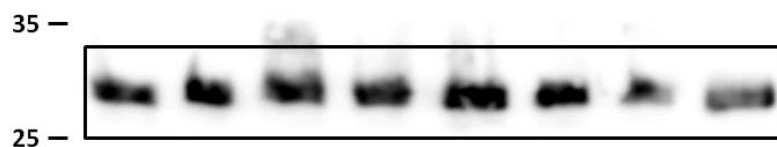

IB: Bcl-xL

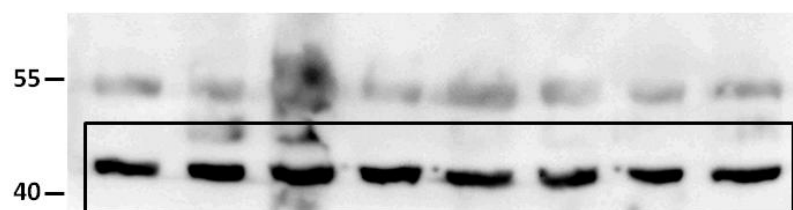

IB:  $\beta$ -actin

**Figure S12. Full-length gels and blots for main figures corresponded to Fig. 6A and 6B. Molecular weight is shown at the left panel (kDa).**
